# Supplementary material
Source: PubMed Central journal article supplement (PMC3257917)
Supplement: supp_79.11.4286_FIGURE_S3.pdf [file supp_79.11.4286_FIGURE_S3.pdf]

**Fig. S3.** A PATRIC Disease Map illustrating the high activity index in Europe of reported *Escherichia coli* infections during the recent outbreak of the German EHEC/VTEC strain. The 'Disease Map' page provides a real-time global view of recent reports and outbreaks of bacterial diseases, with geolocation superimposed on an interactive global HealthMap [1]. Additional information on diseases, places, and sources is available along the bottom of the map.

1. Brownstein JS, Freifeld CC, Reis BY, Mandl KD: **Surveillance Sans Frontieres: Internet-based emerging infectious disease intelligence and the HealthMap project.** *PLoS Med* 2008, **5**(7):e151.
