# Supplementary material
Source: PubMed Central journal article supplement (PMC3257917)
Supplement: supp_79.11.4286_FIGURE_S4.pdf [file supp_79.11.4286_FIGURE_S4.pdf]

**Fig. S4.** Additional information supporting the use case “Application to Annotation Driven by Data Integration: Drug and Vaccine Targeting”. (A, B) Experimental design for annotating bacterial genes with drug targeting attributes. Black arrows depict the direction of the workflow, while red dashed arrows illustrate reverse position specific blast (RPSBLAST) searches [1] (all significant matches with an E-value cutoff of 0.001). The process for annotating genes consists of two steps. (A) In the first step, proteins encoded within the human genome (yellow box, see NCBI ftp site: [ftp://ftp.ncbi.nih.gov/genomes/H\\_sapiens/ARCHIVE/BUILD.36.3/](ftp://ftp.ncbi.nih.gov/genomes/H_sapiens/ARCHIVE/BUILD.36.3/), [2]), proteins with published 3-D structure information (orange box, [3]), and proteins from a database of annotated drug targets (green box, [4, 5]) were searched against a protein family database of position-specific scoring matrices (PSSMs, gray box, [6]). This resulted in the construction of a diverse set of proteins with highly conserved domains, with each protein containing at least one of the predefined drug targeting attributes. (B) In the second step, protein sequences encoded within 800 bacterial genomes (light blue box) were searched against the set of proteins created in A, matching bacterial proteins with proteins containing at least one of the predefined drug targeting attributes. Obtained bacterial proteins were primarily categorized into those without significant similarity to human proteins (36.6%) and those with significant matches to one or more domains within human proteins (63.4%). All proteins were then further distinguished as containing one, two or three of the predefined drug targeting attributes. (C) Attributes and distribution of the “reverse annotated” proteins across the genomes of 22 genera containing NIAID Category A, B and C priority microbial pathogens (800 total genomes). Target class information as follows: first column indicates whether a human protein homologue exists for the protein, with “H” indicating ‘yes’; second column indicates whether a drug target homolog exists, with “A” indicating an approved drug target homolog and “D” indicating an experimental drug target homolog; third column indicates whether a 3-D structure exists for a protein homolog. Note: attributes of the “reverse annotated” proteins for an exemplar species from each genus (Table 1) provides an idea of the portion per genome of identified candidate drug targets.

1. Marchler-Bauer A, Panchenko AR, Shoemaker BA, Thiessen PA, Geer LY, Bryant SH: **CDD: a database of conserved domain alignments with links to domain three-dimensional structure.** *Nucleic Acids Res* 2002, **30**(1):281-283.
2. Venter JC, Adams MD, Myers EW, Li PW, Mural RJ, Sutton GG, Smith HO, Yandell M, Evans CA, Holt RA *et al*: **The sequence of the human genome.** *Science* 2001, **291**(5507):1304-1351.
3. Berman HM, Westbrook J, Feng Z, Gilliland G, Bhat TN, Weissig H, Shindyalov IN, Bourne PE: **The Protein Data Bank.** *Nucleic Acids Res* 2000, **28**(1):235-242.
4. Knox C, Law V, Jewison T, Liu P, Ly S, Frolkis A, Pon A, Banco K, Mak C, Neveu V *et al*: **DrugBank 3.0: a comprehensive resource for 'omics' research on drugs.** *Nucleic Acids Res* 2011, **39**(Database issue):D1035-1041.
5. Wishart DS, Knox C, Guo AC, Cheng D, Shrivastava S, Tzur D, Gautam B, Hassanali M: **DrugBank: a knowledgebase for drugs, drug actions and drug targets.** *Nucleic Acids Res* 2008, **36**(Database issue):D901-906.
6. Gribskov M, McLachlan AD, Eisenberg D: **Profile analysis: detection of distantly related proteins.** *Proc Natl Acad Sci U S A* 1987, **84**(13):4355-4358.

**A**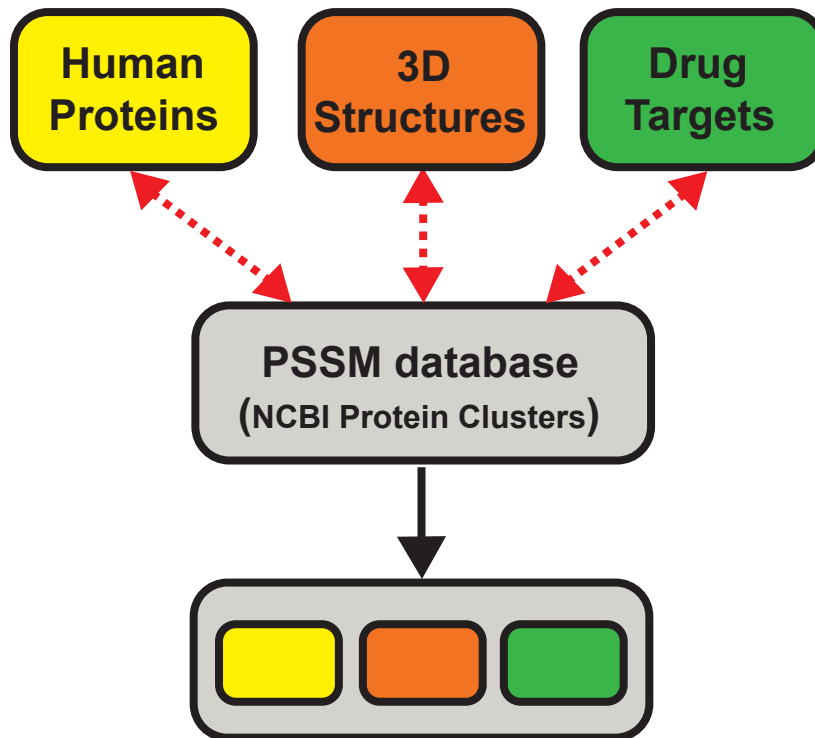**B**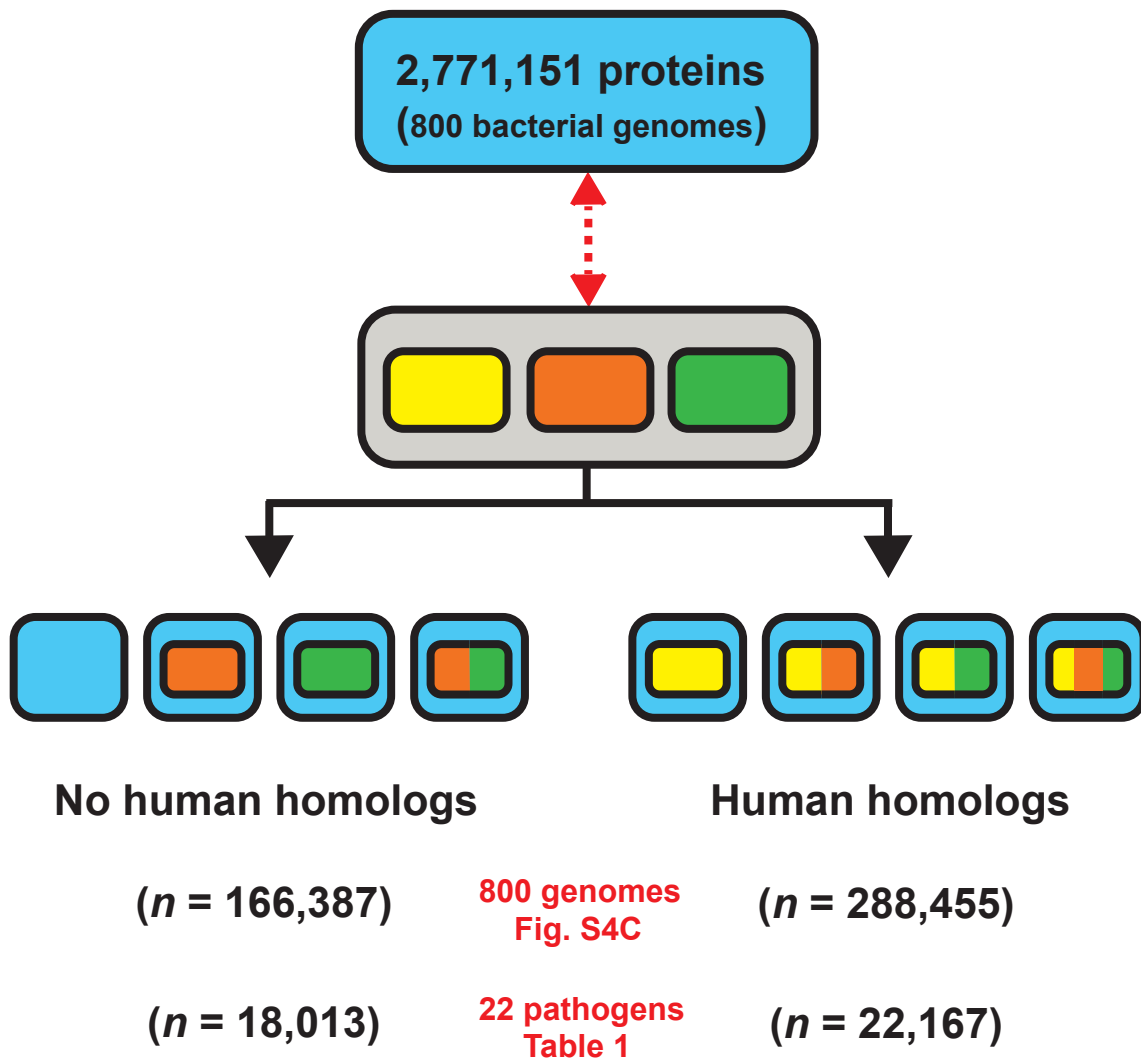

C

| Target Class by Homology <sup>1</sup> |             |          | Organism Genus <sup>2</sup> |      |      |      |       |      |     |       |     |     |      |      |      |      |       |      |      |      |      |      |       |      |  |
|---------------------------------------|-------------|----------|-----------------------------|------|------|------|-------|------|-----|-------|-----|-----|------|------|------|------|-------|------|------|------|------|------|-------|------|--|
| Human                                 | Drug Target | 3D       | Bac                         | Bar  | Bor  | Bru  | Bur   | Cam  | Chl | Clo   | Cox | Ehr | Esc  | Fra  | Hel  | Lis  | Myc   | Ric  | Sal  | Shi  | Sta  | Str  | Vib   | Yer  |  |
|                                       |             |          | 3554                        | 301  | 309  | 1323 | 4537  | 760  | 124 | 3469  | 48  | 82  | 1644 | 195  | 594  | 523  | 1141  | 722  | 751  | 2034 | 831  | 1092 | 3975  | 3523 |  |
|                                       |             | <b>S</b> | 7511                        | 603  | 560  | 2247 | 7612  | 1807 | 223 | 8569  | 117 | 171 | 2241 | 422  | 1398 | 1293 | 3320  | 1282 | 1098 | 2313 | 2039 | 2861 | 6354  | 5310 |  |
|                                       | <b>A</b>    | <b>S</b> | 1293                        | 84   | 90   | 326  | 1282  | 384  | 52  | 1465  | 15  | 22  | 237  | 58   | 305  | 173  | 939   | 179  | 111  | 263  | 329  | 465  | 879   | 569  |  |
|                                       | <b>D</b>    |          | 5                           |      |      |      | 14    | 2    |     | 6     |     |     | 24   | 1    | 2    |      |       |      | 8    | 11   |      | 3    | 39    | 44   |  |
|                                       | <b>D</b>    | <b>S</b> | 7696                        | 432  | 516  | 2560 | 11663 | 1355 | 180 | 10959 | 88  | 107 | 2003 | 361  | 1113 | 1262 | 4260  | 820  | 1011 | 1998 | 1717 | 2604 | 8093  | 5027 |  |
| <b>H</b>                              |             |          | 1126                        | 80   | 53   | 415  | 1153  | 182  | 28  | 1206  | 17  | 33  | 274  | 57   | 176  | 139  | 408   | 333  | 133  | 265  | 231  | 298  | 765   | 749  |  |
| <b>H</b>                              |             | <b>S</b> | 4734                        | 659  | 837  | 1753 | 4866  | 1213 | 357 | 5132  | 138 | 285 | 1066 | 385  | 1090 | 789  | 2366  | 1799 | 530  | 1081 | 1535 | 1982 | 3704  | 2778 |  |
| <b>H</b>                              | <b>A</b>    |          | 586                         | 60   | 21   | 201  | 1145  | 89   | 3   | 331   | 21  | 30  | 174  | 86   | 51   | 62   | 278   | 171  | 76   | 184  | 148  | 82   | 292   | 293  |  |
| <b>H</b>                              | <b>A</b>    | <b>S</b> | 21645                       | 1801 | 1601 | 7299 | 25755 | 4403 | 911 | 23875 | 462 | 673 | 3496 | 1428 | 3730 | 3196 | 19974 | 4088 | 1696 | 3536 | 6039 | 8078 | 13822 | 9134 |  |
| <b>H</b>                              | <b>D</b>    |          | 59                          | 10   | 9    | 18   | 39    | 19   | 8   | 87    | 2   | 6   | 22   | 6    | 18   | 10   | 33    | 31   | 8    | 18   | 30   | 17   | 43    | 27   |  |
| <b>H</b>                              | <b>D</b>    | <b>S</b> | 8858                        | 836  | 1014 | 2729 | 8739  | 2095 | 495 | 10896 | 202 | 332 | 1748 | 642  | 1879 | 1515 | 5439  | 2058 | 813  | 1771 | 2552 | 3925 | 6828  | 4343 |  |

<sup>1</sup> N, protein has no significant similarity to a human protein; H, protein has significant similarity to a human protein; A, protein has a significant similarity to an approved drug target; D, protein has significant similarity to a drug target under experimental testing; S, protein has significant similarity to a protein with associated 3D structure in the Protein Data Bank.

<sup>2</sup> BAC, *Bacillus*; BAR, *Bartonella*; BOR, *Borrelia*; BRU, *Brucella*; BUR, *Burkholderia*; CAM, *Campylobacter*; CHL, *Chlamydomphila*; CLO, *Clostridium*; COX, *Coxiella*; EHR, *Ehrlichia*; ESC, *Escherichia*; FRA, *Francisella*; HEL, *Helicobacter*; LIS, *Listeria*; MYC, *Mycobacterium*; RIC, *Rickettsia*; SAL, *Salmonella*; SHI, *Shigella*; STA, *Staphylococcus*; STR, *Streptococcus*; VIB, *Vibrio*; YER, *Yersinia*.
